# Supplementary material
Source: Springer Nature journal article supplement (https://springermedizin.de/resource/supplementary/13054_2011_960_MOESM1_ESM.pdf/9708804)

Control group in ICU

Intervention group in ICU

2006

2007

2008

2009

Questionnaires sent to control  
group 14 months after ICU

Questionnaires sent to intervention  
group 14 months after ICU

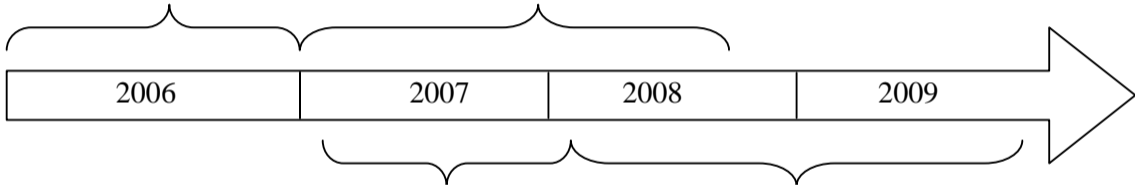

Supplement: MOESM1 [file 9708804]
